# Supplementary material for: A cysteine-rich secretory protein involves in phytohormone melatonin mediated plant resistance to CGMMV
Source: BMC Plant Biol. 2023 Apr 25;23:215. doi: 10.1186/s12870-023-04226-7 (PMC10127030; doi:10.1186/s12870-023-04226-7)
Supplement: Supplementary file 2 — Additional file 2: Table S1. The primers used in this study. Table S2. CGMMV_CK vs WT responsive genes in Tobacco. Table S3. CGMMV_MEL vs CGMMV_CK responsive genes in Tobacco. [file 12870_2023_4226_MOESM2_ESM.xls]

## Sheet: Table S1 
Table S1 The primers used in this study
Name	primer (5' to 3')	Functions
NbUBC RT f	5'- CACAGAGCAAAGACTGGATTGA -3'	qRT-PCR
CGMMV-CP RT f	5'- CCAGACTCAAGCGGGAAGA -3'	qRT-PCR
CGMMV-CP RT f	5'- TCTACAACCTCAATGACCC -3'	qRT-PCR
CsUBI RT f	5'- CACCAAGCCCAAGAAGATC -3'	qRT-PCR
CsUBI RT f	5'- TAAACCTAATCACCACCAGC -3'	qRT-PCR
MYB EFM-like RT f	5'- CGATGCCTTTAAACGAGAGC -3'	qRT-PCR
MYB EFM-like RT r	5'- CTGCCACGAGCTCATCCAAC -3'	qRT-PCR
MYB1R1 RT f	5'- GGGTTCATGCTCTTTGGTGT -3'	qRT-PCR
MYB1R1 RT r	5'- ACGGGTCCTAGCAGAAGGAT -3'	qRT-PCR
ERF1B RT f	5'- CAATCCAAGAAATCCCCAGA -3'	qRT-PCR
ERF1B RT r	5'- CAAGTTTGGGCACCTCTCAT -3'	qRT-PCR
ERF RAP2-1 RT f	5'- ATGGAAGGAGGGTCATGTTG -3'	qRT-PCR
ERF RAP2-1 RT r	5'- TTTAGCAGAAGGGCCTCTCA -3'	qRT-PCR
PR1b RT f	5'- GGTGGGCAAATTCAAGAAAA -3'	qRT-PCR
PR1b RT r	5'- CACAAAGTTGCCCTTCAACA -3'	qRT-PCR
PR1a RT f	5'- CGTTGAGATGTGGGTCAATG -3'	qRT-PCR
PR1a RT r	5'- CCTAGCACATCCAACACGAA -3'	qRT-PCR
TRV-CP RT f	5'- ACTCACGGGCTAACAGTGCT -3'	qRT-PCR
TRV-CP RT r	5'- TCTTCCAAAGTCGAGCCAGT -3'	qRT-PCR
MYB1R1 VIGS-F	5'- AGTGGTCTCTGTCCAGTCCTCAAGACAAGGACCCCTACTC -3'	VIGS
MYB1R1 VIGS-R	5'- GGTCTCAGCAGACCACAAGTGGTATTGGCCTAATGGGCT -3'	VIGS
PR1 VIGS-F	5'- AGTGGTCTCTGTCCAGTCCTATGGAGTTACCATTAACGTGG -3'	VIGS
PR1 VIGS-R	5'- GGTCTCAGCAGACCACAAGTTAATACTTTTGTTCATCAGCCCAAG -3'	VIGS
ERF RAP2-1 VIGS-F	5'- AGTGGTCTCTGTCCAGTCCTGTGGGTGGCAGAAATAAGAG -3'	VIGS
ERF RAP2-1 VIGS-R	5'- GGTCTCAGCAGACCACAAGTTCTTGCGAATATCAGAAGCAGAG -3'	VIGS

## Sheet: Table S2 
Table S2 CGMMV_CK vs WT responsive genes in Tobacco
gene_id	CGMMV_CK	WT	log2FoldChange	pvalue	padj
Nbv5tr6240840.path1	873.471	80.2456	3.44689	4.68417e-46	1.03141e-41
Nbv5tr6207716.path1	373.037	4.08257	6.48391	3.81978e-45	4.20538e-41
Nbv5tr6431459.path1	848.868	124.232	2.76931	7.33936e-44	5.38684e-40
Nbv5tr6408989.path2	360.35	16.3405	4.46211	2.8805e-42	1.58565e-38
Nbv5tr6412214.path1	5165.94	1439.67	1.84329	5.67376e-39	2.49861e-35
Nbv5tr6203197.path1	233.378	9.01303	4.69017	1.003e-37	3.68086e-34
Nbv5tr6222462.path1	202.856	6.5721	4.94091	1.37274e-33	4.31805e-30
Nbv5tr6202217.path1	312.294	37.8287	3.04328	1.74463e-33	4.80187e-30
Nbv5tr6245715.path1	769.125	166.714	2.20644	2.56621e-33	6.27838e-30
Nbv5tr6215121.path1	599.95	78.0168	2.94497	2.19429e-31	4.83162e-28
Nbv5tr6216022.path1	179.405	9.16591	4.30425	3.84708e-30	7.7008e-27
Nbv5tr6205400.path1	216.787	26.7293	3.0179	6.51735e-27	1.19588e-23
Nbv5tr6230416.path1	963.934	212.842	2.17694	3.43313e-26	5.81493e-23
novel.2815	276.254	46.2079	2.58328	1.71603e-25	2.69894e-22
Nbv5tr6200677.path1	191.343	12.2142	3.94861	9.50759e-25	1.39565e-21
Nbv5tr6235056.path1	3247.38	182.875	4.14916	3.02913e-24	4.16866e-21
Nbv5tr6408989.path1	173.566	3.14769	5.7911	5.57545e-24	7.22152e-21
novel.3587	776.894	247.234	1.65158	7.25553e-24	8.87553e-21
Nbv5tr6241925.path1	2062.15	725.761	1.50703	1.97631e-23	2.29034e-20
Nbv5tr6200694.path1	3206.85	9679.3	-1.59375	4.38555e-23	4.82827e-20
Nbv5tr6412983.path1	1029.23	357.891	1.52389	1.75747e-22	1.84275e-19
Nbv5tr6213007.path1	337.378	46.4944	2.85473	2.67432e-22	2.67663e-19
Nbv5tr6215061.path1	304.778	33.0913	3.20375	3.94362e-22	3.77542e-19
novel.623	1214.09	341.189	1.83216	4.67176e-22	4.28615e-19
Nbv5tr6211157.path1	884.429	192.648	2.19867	1.85632e-21	1.58506e-18
novel.4318	197.326	24.4819	3.01409	1.87163e-21	1.58506e-18
Nbv5tr6413004.path1	2540.1	954.757	1.41151	2.95901e-20	2.35554e-17
Nbv5tr6270804.path1	41.5993	302.726	-2.86391	2.99537e-20	2.35554e-17
Nbv5tr6212722.path1	1416.2	318.214	2.15488	3.71548e-20	2.73759e-17
Nbv5tr6207830.path1	184.037	12.7778	3.84295	3.72985e-20	2.73759e-17
Nbv5tr6290208.path1	134.024	6.90872	4.27101	4.47854e-20	3.18106e-17
Nbv5tr6267498.path1	262.456	38.0466	2.79221	9.77283e-20	6.72462e-17
Nbv5tr6243790.path1	3396.32	864.315	1.97448	2.57372e-19	1.7173e-16
novel.3291	122.418	2.09343	5.87299	5.50635e-19	3.56601e-16
Nbv5tr6342370.path1	255.244	49.6922	2.36374	6.26024e-19	3.9384e-16
Nbv5tr6420977.path2	682.068	204.402	1.73664	7.79065e-19	4.76506e-16
novel.2627	140.899	18.9279	2.88768	3.33908e-18	1.94238e-15
novel.3206	304.918	83.0105	1.87992	3.35213e-18	1.94238e-15
Nbv5tr6216442.path1	143.278	2.16422	6.09141	3.62362e-18	2.04586e-15
Nbv5tr6240871.path1	1693.41	774.718	1.12831	4.67284e-18	2.57228e-15
Nbv5tr6412043.path1	1872.24	806.869	1.2144	1.66582e-17	8.94629e-15
Nbv5tr6200856.path1	2127.87	4764.63	-1.16295	1.81326e-17	9.50622e-15
Nbv5tr6290971.path1	162.34	25.6626	2.66785	6.07447e-17	3.11055e-14
Nbv5tr6226077.path1	1167.73	350.343	1.73553	6.87156e-17	3.43875e-14
Nbv5tr6201421.path1	8.90726	97.1977	-3.445	4.86734e-16	2.38164e-13
Nbv5tr6246268.path1	110.261	8.4596	3.71513	5.35912e-16	2.56527e-13
Nbv5tr6246541.path2	86.3501	4.48244	4.25802	1.15352e-15	5.4041e-13
Nbv5tr6337512.path1	481.837	123.1	1.9686	1.46897e-15	6.73861e-13
Nbv5tr6234917.path1	141.203	24.4257	2.5327	2.83198e-15	1.2726e-12
Nbv5tr6230744.path1	556.539	199.23	1.48325	4.0246e-15	1.77235e-12
Nbv5tr6235532.path1	91.8392	5.01368	4.15579	4.60694e-15	1.98902e-12
Nbv5tr6213724.path1	423.873	157.066	1.43323	1.82117e-14	7.56609e-12
Nbv5tr6223117.path1	80.0879	3.69025	4.40116	3.41102e-14	1.39087e-11
novel.931	75.677	3.03586	4.60417	3.7471e-14	1.50014e-11
novel.822	72.8837	3.11041	4.54223	4.53755e-14	1.78415e-11
novel.291	205.992	59.1349	1.80332	9.18106e-14	3.54663e-11
Nbv5tr6236185.path1	4785.88	2314.17	1.04826	9.35701e-14	3.55228e-11
Nbv5tr6287499.path1	22.8433	124.235	-2.44348	1.17085e-13	4.36965e-11
novel.1385	118.202	23.3007	2.34217	2.26576e-13	8.17866e-11
Nbv5tr6201806.path1	451.056	179.234	1.33021	3.39329e-13	1.20511e-10
Nbv5tr6213172.path1	111.451	340.598	-1.61239	3.95981e-13	1.38398e-10
novel.3442	66.5484	3.82805	4.11984	4.97429e-13	1.71139e-10
Nbv5tr6201906.path1	122.49	13.8245	3.14327	9.2993e-13	3.15017e-10
Nbv5tr6277944.path2	458.534	165.194	1.47426	9.86655e-13	3.29169e-10
Nbv5tr6217825.path1	297.204	99.8702	1.57571	1.08633e-12	3.57015e-10
Nbv5tr6230542.path1	2261.82	1028.06	1.13735	1.38207e-12	4.47527e-10
Nbv5tr6215137.path1	125.266	26.9909	2.21074	1.57218e-12	5.01708e-10
Nbv5tr6206693.path2	491.824	1069.31	-1.12093	2.06114e-12	6.48345e-10
novel.4229	500.672	1522.54	-1.60447	2.60751e-12	8.08658e-10
Nbv5tr6219112.path2	1476.04	558.813	1.40161	2.84415e-12	8.69796e-10
Nbv5tr6199889.path1	1022.97	105.422	3.27906	3.16e-12	9.53152e-10
Nbv5tr6204748.path1	674.409	1356.23	-1.00822	5.46637e-12	1.62654e-09
Nbv5tr6211622.path1	106.765	288.945	-1.43673	5.71926e-12	1.6791e-09
Nbv5tr6424537.path2	1022.46	310.181	1.72139	6.61579e-12	1.91675e-09
Nbv5tr6238100.path1	61.618	3.03586	4.30953	7.83751e-12	2.24122e-09
Nbv5tr6213243.path1	158.155	34.2649	2.20916	7.9777e-12	2.25206e-09
Nbv5tr6217402.path1	62.3332	1.76435	5.15942	9.54375e-12	2.66005e-09
Nbv5tr6205767.path2	76.879	1.08777	6.1968	9.88765e-12	2.72145e-09
novel.3351	602.676	274.464	1.13334	1.24279e-11	3.37841e-09
Nbv5tr6200676.path1	834.567	1913.83	-1.19728	1.72031e-11	4.61944e-09
novel.2954	63.9017	1.80917	5.18805	2.2802e-11	6.04911e-09
novel.516	265.715	95.9488	1.47208	3.02664e-11	7.84041e-09
Nbv5tr6287499.path2	16.3396	97.0048	-2.56929	3.36019e-11	8.60325e-09
Nbv5tr6230864.path1	254.373	83.9154	1.60316	3.85208e-11	9.63852e-09
Nbv5tr6236005.path2	291.155	665.874	-1.19406	4.19706e-11	1.03837e-08
Nbv5tr6207773.path1	188.782	50.901	1.89194	6.14593e-11	1.50364e-08
novel.1830	677.57	259.248	1.38418	7.51788e-11	1.81908e-08
Nbv5tr6216373.path1	52.4846	164.287	-1.646	9.19838e-11	2.20151e-08
Nbv5tr6230200.path1	2627.63	1260.89	1.05932	1.20318e-10	2.81838e-08
Nbv5tr6226847.path1	34.3051	128.679	-1.90827	1.40405e-10	3.25429e-08
Nbv5tr6218563.path1	542.088	1106.37	-1.02916	1.84758e-10	4.23769e-08
novel.3017	77.4709	11.8618	2.70906	2.43017e-10	5.51648e-08
novel.1511	101.355	18.6534	2.44886	2.50716e-10	5.63318e-08
novel.2395	228.306	86.3197	1.40496	3.09463e-10	6.81406e-08
Nbv5tr6205353.path1	96.7017	258.799	-1.41961	3.23533e-10	7.05335e-08
Nbv5tr6235207.path1	61.5947	4.19063	3.88083	4.26474e-10	9.11702e-08
Nbv5tr6231338.path1	62.7608	5.22603	3.58729	4.52734e-10	9.58534e-08
novel.1860	524.752	187.868	1.48427	6.06518e-10	1.2599e-07
Nbv5tr6227771.path1	824.437	108.267	2.92911	7.42333e-10	1.52761e-07
Nbv5tr6199329.path2	87.9749	272.828	-1.63365	8.11122e-10	1.65371e-07
Nbv5tr6287388.path2	104.408	261.862	-1.32802	1.00381e-09	2.00936e-07
Nbv5tr6199584.path1	265.005	112.78	1.23383	1.08382e-09	2.14996e-07
Nbv5tr6243567.path1	304.614	133.668	1.18738	1.14757e-09	2.2561e-07
Nbv5tr6257271.path1	460.224	204.25	1.17015	1.30004e-09	2.53323e-07
Nbv5tr6199221.path1	762.52	368.162	1.05149	1.44357e-09	2.78823e-07
Nbv5tr6225065.path2	6.44675	66.8314	-3.37082	1.70168e-09	3.25708e-07
Nbv5tr6407020.path1	83.8603	18.2016	2.20795	1.71589e-09	3.25708e-07
Nbv5tr6218562.path3	51.1996	150.972	-1.55892	1.79054e-09	3.36974e-07
Nbv5tr6409283.path1	2.75823	47.7258	-4.10849	2.39061e-09	4.42343e-07
Nbv5tr6199163.path2	158.98	466.544	-1.55294	2.46584e-09	4.52461e-07
Nbv5tr6219976.path1	294.709	127.093	1.21433	2.89793e-09	5.27351e-07
novel.3709	85.568	17.3495	2.29996	2.93141e-09	5.29071e-07
Nbv5tr6269684.path1	46.5709	3.15146	3.89159	3.76836e-09	6.74597e-07
Nbv5tr6212618.path1	274.514	99.9958	1.4594	4.6869e-09	8.26253e-07
Nbv5tr6237683.path1	54.4265	2.51926	4.46574	5.23125e-09	9.14182e-07
Nbv5tr6226767.path1	582.829	246.865	1.23979	5.83444e-09	1.01156e-06
novel.1454	184.779	394.492	-1.09498	6.53715e-09	1.12454e-06
Nbv5tr6225034.path2	587.962	201.45	1.54724	7.15484e-09	1.22126e-06
Nbv5tr6258849.path2	181.264	511.44	-1.4969	7.41236e-09	1.25548e-06
novel.3848	208.234	60.1387	1.79722	7.50503e-09	1.26148e-06
novel.890	3.42698	48.1056	-3.81711	8.18507e-09	1.35509e-06
Nbv5tr6218337.path1	35.4214	0	7.52536	8.32019e-09	1.36718e-06
novel.3935	365.603	140.277	1.37983	8.87975e-09	1.43767e-06
Nbv5tr6216079.path1	135.723	0.358817	8.50127	1.20314e-08	1.9197e-06
Nbv5tr6207887.path1	90.2358	21.0089	2.10659	1.47443e-08	2.33564e-06
Nbv5tr6228543.path1	73.9338	14.119	2.3973	1.71344e-08	2.67575e-06
Nbv5tr6221452.path1	50.4317	155.173	-1.62221	1.81256e-08	2.81062e-06
Nbv5tr6323420.path2	553.423	243.357	1.18666	1.97007e-08	2.97199e-06
Nbv5tr6203087.path1	316.267	109.09	1.53678	1.98397e-08	2.97199e-06
novel.2356	162.442	34.2789	2.24986	1.98412e-08	2.97199e-06
Nbv5tr6201969.path1	226.275	81.1208	1.47979	2.0632e-08	3.06956e-06
novel.498	164.19	47.6803	1.78134	2.1352e-08	3.15536e-06
Nbv5tr6260772.path2	339.034	118.359	1.52042	2.15838e-08	3.16836e-06
novel.4393	237.008	537.539	-1.18265	2.42665e-08	3.53857e-06
Nbv5tr6203129.path1	401.966	180.662	1.15453	2.58386e-08	3.74302e-06
Nbv5tr6371532.path1	1174.9	2412.18	-1.038	2.64666e-08	3.80894e-06
Nbv5tr6238773.path1	21.5796	84.2776	-1.96571	2.8839e-08	4.12341e-06
Nbv5tr6240267.path1	29.6177	0	7.26694	3.37624e-08	4.79623e-06
Nbv5tr6239794.path1	782.979	1656.29	-1.08107	3.54923e-08	5.00964e-06
Nbv5tr6199329.path1	17.576	82.8931	-2.2371	3.58242e-08	5.02429e-06
Nbv5tr6227446.path1	113.323	32.2565	1.81628	4.20588e-08	5.78648e-06
Nbv5tr6240787.path1	232.31	103.805	1.16254	4.21776e-08	5.78648e-06
Nbv5tr6344663.path2	38.7643	2.08966	4.21453	4.3021e-08	5.84741e-06
Nbv5tr6265182.path2	55.442	8.51907	2.71737	4.90001e-08	6.61922e-06
Nbv5tr6237556.path1	51.5158	6.91583	2.89179	4.95617e-08	6.65426e-06
Nbv5tr6356776.path2	166.084	63.2272	1.38992	5.18558e-08	6.92008e-06
novel.741	118.216	34.7886	1.7649	5.43382e-08	7.20766e-06
Nbv5tr6216698.path1	75.3691	229.882	-1.60952	5.50787e-08	7.26215e-06
Nbv5tr6223647.path1	28.8998	0	7.23209	5.7394e-08	7.52237e-06
Nbv5tr6200431.path1	28.3536	0	7.20419	6.13696e-08	7.99585e-06
Nbv5tr6339516.path1	35.7569	2.09343	4.09714	6.45741e-08	8.31495e-06
novel.3685	26.5399	0	7.1086	6.92708e-08	8.81661e-06
Nbv5tr6199655.path1	564.103	281.01	1.00677	7.03359e-08	8.90072e-06
Nbv5tr6241923.path1	26.5667	0	7.10988	8.28253e-08	1.04213e-05
Nbv5tr6272699.path1	207.255	90.3304	1.20061	9.94098e-08	1.2437e-05
Nbv5tr6215474.path1	44.5283	0.362589	6.89404	1.02794e-07	1.27217e-05
Nbv5tr6225440.path1	347.092	135.67	1.35855	1.02841e-07	1.27217e-05
Nbv5tr6237787.path1	125.954	23.3708	2.43683	1.11547e-07	1.36453e-05
Nbv5tr6420665.path2	96.8424	26.9379	1.84824	1.14365e-07	1.39127e-05
Nbv5tr6228611.path1	200.27	418.369	-1.06369	1.15474e-07	1.39704e-05
novel.2195	36.3528	2.81861	3.70169	1.21875e-07	1.46643e-05
novel.1049	301.437	115.438	1.38533	1.28375e-07	1.51168e-05
Nbv5tr6239607.path1	64.2618	162.698	-1.3418	1.28382e-07	1.51168e-05
Nbv5tr6237973.path1	127.421	22.4042	2.5044	1.33897e-07	1.56823e-05
novel.29	50.366	5.20762	3.27251	1.37743e-07	1.60474e-05
Nbv5tr6270939.path2	83.422	229.24	-1.45913	1.53773e-07	1.78207e-05
Nbv5tr6226306.path2	211.655	88.7383	1.25694	1.65782e-07	1.91119e-05
Nbv5tr6211259.path1	168.952	343.254	-1.02304	1.75092e-07	1.9976e-05
Nbv5tr6228475.path1	24.7308	0	7.00646	1.83029e-07	2.07738e-05
novel.4281	98.1915	215.834	-1.1368	1.87118e-07	2.10362e-05
Nbv5tr6303034.path1	16.9167	73.851	-2.12509	1.87252e-07	2.10362e-05
Nbv5tr6215487.path1	53.5533	6.03331	3.16426	1.94074e-07	2.1692e-05
novel.3744	300.016	148.867	1.01092	2.11982e-07	2.34555e-05
Nbv5tr6337509.path1	366.627	126.874	1.53131	2.29546e-07	2.52718e-05
novel.1864	39.849	4.04152	3.2717	2.34006e-07	2.56347e-05
Nbv5tr6243512.path1	16.9436	70.753	-2.05967	2.39258e-07	2.60803e-05
Nbv5tr6237213.path1	389.53	165.397	1.23658	2.42576e-07	2.63118e-05
Nbv5tr6369478.path1	33.6372	2.02642	4.0209	2.63752e-07	2.84684e-05
Nbv5tr6302519.path2	256.893	121.886	1.07369	2.77298e-07	2.97845e-05
Nbv5tr6204576.path1	228.786	97.7433	1.22924	2.83799e-07	3.03348e-05
Nbv5tr6221512.path1	35.2166	0.362589	6.5547	3.14514e-07	3.32947e-05
Nbv5tr6223283.path1	73.7692	170.934	-1.21287	3.25818e-07	3.43194e-05
Nbv5tr6244564.path1	10.2037	55.1227	-2.437	3.27311e-07	3.43194e-05
novel.2419	386.684	929.088	-1.26527	3.35205e-07	3.49391e-05
Nbv5tr6380618.path1	99.297	18.5307	2.42414	3.4609e-07	3.57773e-05
Nbv5tr6295090.path2	982.19	477.028	1.04149	3.47878e-07	3.5794e-05
Nbv5tr6241922.path1	881.892	401.736	1.13375	3.50704e-07	3.5917e-05
Nbv5tr6206309.path1	245.892	116.472	1.0796	3.64918e-07	3.7148e-05
novel.1518	83.2403	21.6158	1.93738	3.66098e-07	3.7148e-05
novel.595	282.039	124.124	1.18329	3.84348e-07	3.88209e-05
Nbv5tr6319162.path1	69.7312	18.8409	1.88952	4.3489e-07	4.31344e-05
Nbv5tr6201713.path1	150.37	51.9694	1.53379	4.49621e-07	4.43956e-05
Nbv5tr6231312.path1	378.741	132.269	1.51914	5.15279e-07	5.02033e-05
Nbv5tr6241850.path1	326.044	682.505	-1.06577	5.25726e-07	5.09954e-05
Nbv5tr6200775.path1	153.67	40.9051	1.90839	5.53328e-07	5.34374e-05
Nbv5tr6202841.path2	168.432	64.1965	1.39486	6.00514e-07	5.72412e-05
Nbv5tr6221725.path1	15.4218	61.0981	-1.98504	6.12121e-07	5.78527e-05
Nbv5tr6236393.path1	662.606	290.154	1.1927	6.12184e-07	5.78527e-05
novel.1632	46.8899	5.16657	3.17333	6.85026e-07	6.42627e-05
Nbv5tr6207753.path1	436.642	197.85	1.14342	6.85956e-07	6.42627e-05
Nbv5tr6416009.path1	35.5568	2.27717	3.89903	7.51035e-07	6.94834e-05
novel.2340	30.8386	1.08399	4.87541	7.69722e-07	7.09142e-05
Nbv5tr6225687.path1	54.3117	131.656	-1.27795	8.05994e-07	7.33355e-05
Nbv5tr6202574.path2	175.84	70.1666	1.3229	8.18234e-07	7.41428e-05
Nbv5tr6332645.path1	111.089	25.5918	2.12098	9.24657e-07	8.27643e-05
Nbv5tr6231509.path1	30.8558	2.38523	3.67166	9.65531e-07	8.60729e-05
Nbv5tr6335949.path1	53.8053	11.4469	2.22996	1.00027e-06	8.88107e-05
Nbv5tr6200332.path1	13.5742	58.3427	-2.10266	1.06129e-06	9.31016e-05
Nbv5tr6237958.path1	34.5344	3.1326	3.46266	1.0884e-06	9.5101e-05
Nbv5tr6338708.path1	130.024	49.5853	1.38889	1.11899e-06	9.73876e-05
Nbv5tr6203265.path1	92.3249	24.9077	1.89374	1.19373e-06	0.000103078
Nbv5tr6222262.path1	64.1317	14.526	2.15308	1.2657e-06	0.000108442
Nbv5tr6228855.path1	19.1009	0	6.6344	1.27184e-06	0.000108545
Nbv5tr6216607.path1	35.6248	116.219	-1.70742	1.28692e-06	0.000108745
novel.191	81.1465	188.828	-1.21925	1.32443e-06	0.000110469
Nbv5tr6207863.path1	84.8737	183.608	-1.11221	1.32449e-06	0.000110469
Nbv5tr6225358.path3	30.3038	99.677	-1.71842	1.65563e-06	0.00013705
Nbv5tr6423095.path1	93.7158	204.898	-1.12973	1.73658e-06	0.000142678
Nbv5tr6207786.path1	38.5247	4.8488	2.98637	1.82318e-06	0.000148135
Nbv5tr6236988.path1	48.7983	123.915	-1.34608	1.97402e-06	0.000159216
Nbv5tr6201919.path1	28.0109	1.04672	4.74538	2.22573e-06	0.000178212
Nbv5tr6409136.path1	20.602	0	6.7437	2.35569e-06	0.000187934
Nbv5tr6217986.path1	30.4573	2.41874	3.64793	2.46984e-06	0.00019633
Nbv5tr6262814.path1	10.7792	52.486	-2.28275	2.49779e-06	0.000197128
Nbv5tr6230826.path1	21.8198	0	6.82655	2.67535e-06	0.000210387
Nbv5tr6221007.path1	56.3736	137.685	-1.28887	2.76539e-06	0.000215163
Nbv5tr6214506.path1	167.605	71.0637	1.2348	3.08807e-06	0.000238273
Nbv5tr6220616.path1	141.325	57.1495	1.30165	3.09488e-06	0.000238273
Nbv5tr6413891.path1	128.827	49.951	1.36817	3.1994e-06	0.000245462
Nbv5tr6229063.path1	152.695	3.7648	5.33592	3.23288e-06	0.00024717
novel.726	170.198	79.8844	1.0905	3.34194e-06	0.000254623
Nbv5tr6207030.path2	74.7355	162.437	-1.12048	3.4431e-06	0.000261426
Nbv5tr6213986.path1	134.985	53.7067	1.33338	3.57654e-06	0.000270625
Nbv5tr6200302.path1	14.1802	55.8995	-1.97891	3.74005e-06	0.00028114
Nbv5tr6223218.path1	48.121	120.56	-1.32526	3.74104e-06	0.00028114
Nbv5tr6238620.path1	0.305495	24.6894	-6.22053	3.99891e-06	0.000299496
novel.2761	775.889	369.31	1.07169	4.18451e-06	0.00030919
Nbv5tr6227090.path1	6.76294	42.1846	-2.63964	4.28143e-06	0.000315293
novel.524	53.1768	5.22981	3.34728	4.49015e-06	0.000329562
Nbv5tr6227200.path1	114.179	37.4164	1.61141	4.6125e-06	0.000336607
Nbv5tr6237950.path1	115.199	246.154	-1.0954	4.61671e-06	0.000336607
Nbv5tr6202354.path1	57.0564	158.485	-1.47479	4.7429e-06	0.000342406
Nbv5tr6199256.path1	200.88	93.7801	1.09853	4.90475e-06	0.000351784
Nbv5tr6207704.path1	499.899	241.685	1.04846	5.00426e-06	0.000357756
Nbv5tr6215468.path1	95.6846	35.67	1.42592	5.10729e-06	0.00036394
Nbv5tr6261248.path1	373.567	167.895	1.15562	5.35871e-06	0.0003794
novel.65	27.1451	0.687899	5.2874	5.47021e-06	0.000385838
Nbv5tr6239158.path1	97.5755	30.0878	1.70494	5.50221e-06	0.000385838
Nbv5tr6222740.path1	34.4698	3.69025	3.19359	5.52834e-06	0.000386439
Nbv5tr6342370.path2	102.345	26.9417	1.92798	5.55895e-06	0.00038675
novel.3662	56.9364	11.6818	2.29525	5.80499e-06	0.000397553
Nbv5tr6302469.path1	83.3931	29.4134	1.50001	6.03435e-06	0.000410094
Nbv5tr6331367.path1	27.7283	1.05049	4.7293	6.07267e-06	0.000411428
Nbv5tr6244601.path1	172.566	74.8609	1.20851	6.24065e-06	0.000420223
Nbv5tr6223925.path1	16.0033	0	6.3793	6.27477e-06	0.000421232
Nbv5tr6267754.path1	184.169	56.8073	1.69734	7.18723e-06	0.000475242
Nbv5tr6258849.path1	332.2	671.671	-1.01603	7.49367e-06	0.000494021
Nbv5tr6214869.path1	120.276	42.9497	1.48702	7.56707e-06	0.000497371
novel.2811	16.6021	0	6.43239	7.86988e-06	0.000512683
Nbv5tr6217197.path1	49.5963	7.54048	2.70841	7.92107e-06	0.000514495
Nbv5tr6217919.path1	15.6717	0	6.34935	7.98075e-06	0.000516848
Nbv5tr6350158.path2	58.1444	14.3709	2.00599	8.62121e-06	0.000553001
Nbv5tr6240876.path1	15.7495	0	6.35563	8.64648e-06	0.000553001
Nbv5tr6258827.path1	36.3057	5.66318	2.6939	8.66457e-06	0.000553001
Nbv5tr6322109.path1	69.2	13.2301	2.38749	8.9064e-06	0.000565158
Nbv5tr6220013.path1	131.518	48.6602	1.43681	8.94219e-06	0.000565799
Nbv5tr6199223.path1	518.164	242.199	1.099	8.99989e-06	0.000567818
Nbv5tr6424537.path1	642.419	307.736	1.06243	9.0621e-06	0.00057011
Nbv5tr6227232.path1	59.7411	143.981	-1.26849	9.23058e-06	0.000579055
Nbv5tr6392454.path1	66.6704	0	8.43752	9.30849e-06	0.000582283
Nbv5tr6239154.path1	9.83818	44.7878	-2.183	9.59297e-06	0.000596688
novel.3039	36.597	109.627	-1.58357	9.74893e-06	0.000604681
Nbv5tr6310379.path2	27.4742	2.74028	3.31055	1.00435e-05	0.000617733
Nbv5tr6294755.path1	15.8131	63.8079	-2.01368	1.01503e-05	0.000622559
Nbv5tr6234141.path1	128.246	53.0463	1.2749	1.03704e-05	0.000632539
Nbv5tr6217785.path1	33.1862	2.17176	3.96755	1.0716e-05	0.000651814
Nbv5tr6430202.path2	96.2031	36.5609	1.39617	1.0825e-05	0.000653852
Nbv5tr6229610.path1	249.096	121.442	1.0375	1.0935e-05	0.000656071
Nbv5tr6428500.path1	89.9276	29.462	1.60834	1.10354e-05	0.000658947
Nbv5tr6236548.path1	320.337	59.3559	2.43251	1.11273e-05	0.000662192
Nbv5tr6246749.path1	14.5457	0	6.24049	1.12059e-05	0.000665077
novel.527	114.01	37.745	1.59613	1.13002e-05	0.000667073
Nbv5tr6234792.path2	25.2543	0.687899	5.18381	1.13933e-05	0.000669971
Nbv5tr6215788.path1	54.8849	12.6427	2.12346	1.14101e-05	0.000669971
Nbv5tr6232335.path1	25.2115	1.44281	4.16537	1.15698e-05	0.000677541
novel.1468	44.9778	124.478	-1.47036	1.18691e-05	0.000689567
novel.3164	230.361	102.542	1.16756	1.2214e-05	0.00070449
Nbv5tr6201230.path1	15.1212	0	6.29701	1.3075e-05	0.000749733
Nbv5tr6245520.path2	117.481	46.2987	1.34357	1.34605e-05	0.000769835
novel.3652	85.2291	22.0048	1.94887	1.35013e-05	0.00077017
Nbv5tr6361475.path1	116.222	257.449	-1.14596	1.35701e-05	0.000772093
novel.1145	39.2176	107.162	-1.45119	1.37637e-05	0.000781089
Nbv5tr6214714.path1	43.0142	6.96819	2.62728	1.4037e-05	0.000794551
Nbv5tr6424911.path1	177.862	83.2828	1.09823	1.44082e-05	0.000813471
Nbv5tr6406687.path1	47.259	115.629	-1.29304	1.46558e-05	0.00082323
Nbv5tr6379808.path2	285.367	141.226	1.01665	1.65073e-05	0.000914824
Nbv5tr6226440.path1	98.0595	35.8608	1.45146	1.82233e-05	0.00099568
Nbv5tr6227239.path1	57.5359	132.197	-1.20062	1.87341e-05	0.00101853
Nbv5tr6203320.path1	46.2194	10.579	2.13595	1.89752e-05	0.0010291
Nbv5tr6225065.path1	1.22491	21.3278	-4.11634	1.97569e-05	0.00106624
novel.1799	30.1632	84.2219	-1.48114	2.04505e-05	0.00109562
Nbv5tr6200577.path1	82.0778	0	8.73746	2.10257e-05	0.00111827
Nbv5tr6234730.path1	87.3475	32.7411	1.41068	2.24318e-05	0.00118447
Nbv5tr6244768.path1	54.0363	122.316	-1.1799	2.36986e-05	0.00123654
Nbv5tr6231911.path1	123.729	41.5011	1.57903	2.39164e-05	0.00124496
novel.3280	35.8722	99.6499	-1.47592	2.45803e-05	0.00127349
Nbv5tr6207069.path1	24.4186	2.45979	3.32008	2.63701e-05	0.00135538
Nbv5tr6391064.path1	76.8901	21.1839	1.8659	2.64072e-05	0.00135538
Nbv5tr6203659.path1	178.701	74.6501	1.26391	2.65645e-05	0.00136029
novel.499	0.313446	21.1016	-5.98759	2.93615e-05	0.00148282
Nbv5tr6354958.path1	5.2181	32.0716	-2.61787	3.06322e-05	0.00153993
Nbv5tr6408150.path1	69.7603	140.679	-1.01194	3.20515e-05	0.00160761
Nbv5tr6235345.path1	16.6306	61.5008	-1.8851	3.24227e-05	0.00162253
Nbv5tr6373895.path1	223.263	476.981	-1.0955	3.30235e-05	0.00164886
Nbv5tr6213083.path1	772.179	375.852	1.03808	3.46078e-05	0.00170859
novel.3912	210.303	100.492	1.06641	3.48019e-05	0.00171433
novel.386	23.2145	0.717633	5.05106	3.52648e-05	0.00172939
Nbv5tr6221440.path1	406.123	91.8858	2.14343	3.55628e-05	0.00173967
Nbv5tr6224900.path1	137.576	65.6697	1.06851	3.6332e-05	0.0017699
Nbv5tr6285912.path1	15.4645	54.358	-1.81452	3.65018e-05	0.00177425
Nbv5tr6198528.path1	40.7925	99.7742	-1.29046	3.67256e-05	0.00178119
Nbv5tr6221935.path1	175.802	85.3276	1.04175	3.76217e-05	0.00182064
Nbv5tr6224093.path1	21.3109	0.684127	4.93969	3.94366e-05	0.00190012
Nbv5tr6353929.path2	17.2755	68.1377	-1.98199	3.99127e-05	0.00191052
Nbv5tr6201716.path1	34.5956	6.07436	2.52824	4.01533e-05	0.00191786
Nbv5tr6215638.path1	34.813	6.97574	2.32113	4.06621e-05	0.00193796
Nbv5tr6215461.path1	453.53	85.8848	2.40123	4.082e-05	0.00194128
Nbv5tr6228010.path2	2.76618	24.8979	-3.168	4.11303e-05	0.00194763
Nbv5tr6327126.path1	132.973	57.4555	1.21303	4.29455e-05	0.00202922
Nbv5tr6199225.path1	22.8861	1.79786	3.70119	4.40695e-05	0.00207343
novel.4342	146.898	69.9797	1.06599	4.47852e-05	0.00210261
Nbv5tr6233048.path1	14.7323	0	6.26011	4.5221e-05	0.00210958
Nbv5tr6234204.path1	262.826	131.008	1.00541	4.58981e-05	0.00213664
Nbv5tr6245210.path2	30.8169	80.7529	-1.38811	4.64893e-05	0.00215959
Nbv5tr6284858.path1	9.58688	39.4024	-2.04233	4.78401e-05	0.00221301
Nbv5tr6215774.path1	117.855	45.0562	1.39162	4.82178e-05	0.00222219
Nbv5tr6237703.path1	88.1921	36.0153	1.28965	4.82406e-05	0.00222219
Nbv5tr6314311.path1	15.151	53.3847	-1.8204	5.08849e-05	0.00232939
Nbv5tr6248944.path1	23.7859	2.7851	3.09431	5.26487e-05	0.00240513
Nbv5tr6370997.path2	44.3888	107.047	-1.26851	5.31931e-05	0.00242497
novel.2802	19.348	0.32531	5.69157	5.33898e-05	0.00242891
Nbv5tr6263712.path1	28.9307	3.8205	2.91951	5.6611e-05	0.00254163
Nbv5tr6228214.path1	39.188	9.04654	2.11469	5.66756e-05	0.00254163
Nbv5tr6207772.path1	230.75	28.2165	3.03186	5.72461e-05	0.002562
Nbv5tr6311621.path2	41.1526	9.24424	2.16716	6.18231e-05	0.00275386
novel.3118	70.208	25.192	1.48187	6.19084e-05	0.00275386
Nbv5tr6225861.path1	21.3448	62.9057	-1.56224	6.40346e-05	0.00284017
Nbv5tr6306731.path1	26.2652	74.207	-1.4998	6.79603e-05	0.00300486
Nbv5tr6313122.path1	23.6915	1.98537	3.53115	6.95932e-05	0.00307089
novel.2135	176.259	79.6525	1.14591	6.97686e-05	0.00307247
Nbv5tr6406691.path2	52.5991	125.306	-1.25224	7.33975e-05	0.00320663
Nbv5tr6259341.path1	46.1623	12.1683	1.92348	7.49164e-05	0.0032665
novel.3127	150.589	70.2957	1.09941	7.52116e-05	0.00327289
novel.2392	19.7096	1.3758	3.82862	8.09038e-05	0.00349298
Nbv5tr6238126.path1	32.8821	5.12174	2.67002	8.29117e-05	0.00357267
Nbv5tr6284404.path2	79.2055	28.578	1.47633	8.30979e-05	0.0035737
Nbv5tr6221915.path1	31.8775	90.3149	-1.50448	8.68119e-05	0.00370512
Nbv5tr6337509.path2	136.886	55.1122	1.31554	8.68269e-05	0.00370512
Nbv5tr6237783.path1	59.2624	19.2121	1.61721	8.73164e-05	0.0037188
Nbv5tr6221470.path1	85.1277	5.73886	3.88094	9.089e-05	0.00385608
Nbv5tr6225997.path2	38.7217	4.48621	3.10499	9.16399e-05	0.00387765
novel.2415	79.2926	22.3063	1.83026	9.17507e-05	0.00387765
Nbv5tr6199628.path2	11.7189	41.8875	-1.83653	9.54743e-05	0.00399667
Nbv5tr6321608.path1	21.5619	73.0799	-1.76032	9.8131e-05	0.00408459
Nbv5tr6243473.path2	35.6632	2.84457	3.66214	9.88003e-05	0.00410012
Nbv5tr6198251.path2	59.3137	123.989	-1.06472	9.88765e-05	0.00410012
Nbv5tr6231415.path1	39.9963	9.68251	2.04295	0.000101284	0.00417636
Nbv5tr6244766.path1	54.8854	17.8093	1.62584	0.000102777	0.00423
Nbv5tr6412655.path2	40.3864	11.1551	1.85742	0.000104204	0.00428073
Nbv5tr6235808.path1	18.1995	54.6012	-1.58504	0.000105992	0.00432755
Nbv5tr6210265.path1	0.626892	17.4203	-4.81459	0.000107229	0.00436428
Nbv5tr6294530.path1	720.219	153.33	2.23186	0.000111323	0.00451421
Nbv5tr6232443.path1	18.4956	0.725177	4.72136	0.000114958	0.00464453
Nbv5tr6309321.path1	158.791	78.9373	1.00814	0.000116934	0.00471568
Nbv5tr6313260.path1	56.0509	17.2742	1.70524	0.000117426	0.00472687
Nbv5tr6198604.path1	24.8871	1.8054	3.81667	0.000119767	0.00480925
Nbv5tr6224270.path1	18.111	0.32531	5.59622	0.000121281	0.00485545
Nbv5tr6219118.path1	42.494	11.5511	1.88319	0.000124815	0.0049742
Nbv5tr6207060.path3	20.9291	1.73461	3.59021	0.000124926	0.0049742
Nbv5tr6234107.path1	54.7861	14.1499	1.94929	0.000127526	0.00504231
Nbv5tr6309067.path1	93.5346	35.6023	1.39897	0.000128528	0.00507179
Nbv5tr6244768.path2	14.5016	47.3161	-1.70614	0.000131266	0.00516448
Nbv5tr6243515.path1	44.364	11.7424	1.91346	0.000135253	0.00529916
novel.1119	21.8987	59.2931	-1.43617	0.000136199	0.00531733
Nbv5tr6213273.path1	20.0283	2.09343	3.26069	0.000141021	0.00549584
Nbv5tr6234893.path1	25.8123	2.08966	3.62764	0.00014511	0.00562235
Nbv5tr6401427.path1	29.8497	3.50274	3.0959	0.000146616	0.00565384
Nbv5tr6345911.path1	12.678	43.3958	-1.77908	0.000147333	0.00565966
Nbv5tr6210990.path1	32.7379	7.62258	2.09919	0.000147538	0.00565966
Nbv5tr6416597.path2	14.8253	0.358817	5.30653	0.000148657	0.00569266
Nbv5tr6211158.path1	164.261	330.07	-1.00618	0.000149698	0.00572259
Nbv5tr6222065.path1	19.1223	0.975931	4.22031	0.000150607	0.00574733
Nbv5tr6416979.path2	15.9945	50.0819	-1.64515	0.000153218	0.00582679
Nbv5tr6394378.path1	46.6653	13.4646	1.80306	0.000153652	0.00583323
Nbv5tr6377120.path1	135.999	61.6843	1.14341	0.000157619	0.00597236
Nbv5tr6365091.path1	108.126	49.2897	1.13194	0.000161868	0.00610305
Nbv5tr6411304.path2	25.3443	75.587	-1.57771	0.000163057	0.00613734
Nbv5tr6244539.path2	97.0504	26.4025	1.87009	0.000164499	0.00617054
Nbv5tr6431893.path1	20.5812	0.32531	5.78039	0.000166823	0.00624706
Nbv5tr6231769.path1	55.2361	18.4519	1.58192	0.000171033	0.00637995
Nbv5tr6228033.path1	8.29352	106.383	-3.68063	0.000171215	0.00637995
novel.430	27.8073	68.3024	-1.29676	0.000174143	0.00647712
Nbv5tr6222317.path1	30.1919	5.92525	2.35055	0.000174892	0.00649401
Nbv5tr6219088.path1	28.1166	71.0919	-1.33977	0.000177039	0.00656268
Nbv5tr6230719.path2	72.721	26.6791	1.45078	0.00018078	0.00669009
Nbv5tr6212079.path1	112.732	52.5493	1.10147	0.000181481	0.00670474
Nbv5tr6201797.path1	19.7698	1.33475	3.8472	0.00018289	0.00673893
Nbv5tr6199738.path1	82.1762	27.91	1.55921	0.000183324	0.00673893
Nbv5tr6358777.path2	31.4431	74.5826	-1.24523	0.000190008	0.00695531
Nbv5tr6338076.path1	123.611	52.3622	1.2407	0.00019079	0.00695531
novel.174	95.779	41.846	1.19582	0.000193244	0.00702583
Nbv5tr6240733.path1	19.0519	1.05049	4.18776	0.000194785	0.00706586
Nbv5tr6216089.path1	30.8021	4.84503	2.66501	0.000204075	0.00737853
Nbv5tr6237587.path1	36.1907	91.8165	-1.34415	0.000204785	0.00739207
Nbv5tr6222799.path1	218.513	106.93	1.03332	0.000206112	0.00742778
Nbv5tr6290708.path2	62.925	19.0657	1.72093	0.000206961	0.00744425
Nbv5tr6207930.path1	49.6136	16.6097	1.57564	0.000207245	0.00744425
Nbv5tr6223374.path1	23.3344	2.52303	3.23807	0.000209804	0.00752391
Nbv5tr6227991.path1	4.63745	25.6249	-2.46551	0.000228646	0.00815972
Nbv5tr6428205.path2	41.428	102.103	-1.30063	0.000233323	0.00831316
Nbv5tr6211360.path1	12.9423	42.709	-1.72018	0.000242333	0.00857867
Nbv5tr6238069.path1	1.85472	19.8115	-3.41554	0.000243923	0.00862107
Nbv5tr6201214.path1	19.4393	1.44658	3.78442	0.000244671	0.00863368
Nbv5tr6232107.path1	91.132	8.41855	3.43842	0.000251338	0.00882649
Nbv5tr6224442.path1	17.2634	51.9976	-1.59276	0.000251931	0.00883323
Nbv5tr6227311.path1	44.0793	14.0072	1.65787	0.000256264	0.00895664
Nbv5tr6265337.path1	39.0089	93.7096	-1.26472	0.00025852	0.00902117
Nbv5tr6201261.path1	27.3434	4.44516	2.60908	0.000260867	0.00908866
Nbv5tr6348846.path1	20.9866	55.4797	-1.40185	0.000262485	0.00913059
Nbv5tr6231935.path1	20.6745	2.34418	3.10702	0.000264017	0.00916939
Nbv5tr6241106.path2	13.8379	0.362589	5.20795	0.000265924	0.00920721
Nbv5tr6394855.path1	29.6336	75.2539	-1.34345	0.000267175	0.0092209
novel.721	27.3997	4.22037	2.70633	0.00026868	0.00925833
Nbv5tr6202957.path1	39.1085	9.48745	2.04922	0.000270014	0.00928974
novel.3750	112.592	45.9874	1.29462	0.000271677	0.00931541
Nbv5tr6202414.path1	62.7781	2.67704	4.5351	0.000289406	0.00980373
Nbv5tr6241872.path1	16.6423	0.975931	4.01969	0.000296958	0.0100287
novel.1311	84.0154	34.9637	1.26727	0.000298542	0.0100514
Nbv5tr6214707.path1	51.7861	18.2946	1.50739	0.000300215	0.0100843
Nbv5tr6293896.path1	12.9655	42.5739	-1.71887	0.000302319	0.0101167
Nbv5tr6201695.path1	42.311	90.9864	-1.10456	0.000303362	0.0101243
Nbv5tr6281223.path1	60.3319	19.2299	1.65206	0.000306078	0.0101652
Nbv5tr6221854.path1	38.8915	10.1802	1.91847	0.00031173	0.0103063
Nbv5tr6240635.path3	30.4499	75.0431	-1.30028	0.000312913	0.0103299
Nbv5tr6338558.path2	40.9016	5.35296	2.94621	0.000314923	0.0103807
Nbv5tr6206787.path1	87.1904	36.5525	1.25384	0.00031769	0.0104321
Nbv5tr6241936.path1	97.0373	38.8128	1.32661	0.000317905	0.0104321
Nbv5tr6221369.path1	114.045	53.3954	1.09306	0.000325694	0.0106718
Nbv5tr6310591.path1	22.7298	1.70111	3.72195	0.000328094	0.0107345
novel.676	82.9119	33.6376	1.30017	0.000330746	0.0107853
Nbv5tr6236822.path1	7.99095	137.816	-4.10778	0.000331115	0.0107853
Nbv5tr6220488.path1	60.7444	19.7687	1.61721	0.000344251	0.0111308
Nbv5tr6299812.path2	26.7441	0	7.11975	0.000359685	0.0115958
Nbv5tr6232149.path1	39.2655	85.6059	-1.12429	0.00036059	0.0116079
Nbv5tr6221600.path1	86.8703	27.4631	1.6572	0.000364557	0.0117185
Nbv5tr6425969.path2	127.482	59.7409	1.0967	0.000368038	0.011796
Nbv5tr6205114.path1	49.7695	104.629	-1.0714	0.000371462	0.0118818
Nbv5tr6203123.path1	17.8875	2.05615	3.10659	0.000376771	0.0119886
Nbv5tr6203336.path1	25.8963	63.6493	-1.29858	0.000378744	0.012034
Nbv5tr6282188.path1	9.83169	37.3485	-1.92249	0.000385533	0.0122145
Nbv5tr6219349.path1	35.0483	6.28029	2.48228	0.000391561	0.0123658
Nbv5tr6204112.path2	23.9608	3.54379	2.77147	0.000393713	0.0123845
Nbv5tr6236444.path1	220.351	104.478	1.07753	0.000395966	0.0124376
novel.4332	36.6647	6.97196	2.39581	0.000419858	0.0131133
Nbv5tr6378714.path1	56.174	115.768	-1.04359	0.000429502	0.0133576
novel.3438	28.6648	70.9658	-1.30522	0.000452201	0.0139454
Nbv5tr6227121.path1	16.8574	0.684127	4.60482	0.000453792	0.0139749
novel.152	15.6309	0.362589	5.38384	0.000466343	0.0143014
Nbv5tr6219376.path1	56.22	121.445	-1.11399	0.000469887	0.01439
Nbv5tr6213892.path1	16.5804	0.725177	4.5605	0.00047059	0.0143916
Nbv5tr6233452.path1	93.175	45.3785	1.03929	0.000474528	0.014478
novel.3160	44.3311	11.181	1.98949	0.000475205	0.014478
Nbv5tr6284234.path1	85.591	30.56	1.4892	0.000494606	0.0149671
novel.1298	97.8124	32.0743	1.60935	0.000498951	0.0150705
Nbv5tr6262139.path1	36.3738	4.44139	3.02436	0.000501502	0.0151061
Nbv5tr6241616.path1	7.09667	28.2203	-1.99117	0.00051641	0.0155039
Nbv5tr6299980.path2	12.3941	42.2512	-1.77248	0.000522997	0.0156679
Nbv5tr6365912.path1	4.60272	24.5413	-2.40919	0.000524009	0.0156768
Nbv5tr6275378.path1	15.6699	0.358817	5.38713	0.000530625	0.015789
Nbv5tr6225512.path1	150.419	69.0475	1.12689	0.000531623	0.0157973
Nbv5tr6299980.path1	35.6678	97.2436	-1.44959	0.000539257	0.0160026
Nbv5tr6390191.path2	19.0995	2.74405	2.78708	0.000551151	0.0162897
Nbv5tr6320368.path2	37.6518	83.084	-1.1422	0.000554037	0.0163311
Nbv5tr6214925.path1	108.991	52.6027	1.04924	0.000564119	0.0165397
Nbv5tr6227975.path1	107.062	51.5436	1.05484	0.000567729	0.0166234
Nbv5tr6363874.path2	14.8108	1.08022	3.81266	0.000581899	0.0169706
novel.1478	49.8414	117.777	-1.2434	0.000582792	0.0169742
Nbv5tr6412535.path1	604.226	165.932	1.86423	0.000585429	0.0170285
Nbv5tr6374864.path1	44.9017	11.1551	2.01027	0.000586421	0.0170348
novel.304	34.3558	80.6084	-1.23374	0.000587917	0.0170558
Nbv5tr6280322.path1	34.3016	75.0502	-1.13072	0.000590713	0.0170993
Nbv5tr6385135.path1	50.6736	103.343	-1.02949	0.000595961	0.0172211
Nbv5tr6211214.path1	43.5012	14.5573	1.57697	0.000598489	0.0172715
Nbv5tr6215998.path1	58.0316	22.7397	1.35415	0.000600995	0.0173211
Nbv5tr6265954.path1	45.5382	8.8892	2.36561	0.000606118	0.0174459
Nbv5tr6201779.path1	118.38	59.1267	1.00586	0.000607311	0.0174574
Nbv5tr6224922.path1	5.24049	24.9472	-2.25482	0.000612123	0.0175728
novel.1014	40.6398	12.7854	1.66475	0.000615105	0.0176354
Nbv5tr6287168.path1	39.532	81.9853	-1.05327	0.000629487	0.0180009
novel.1005	80.3967	32.2671	1.32384	0.000637749	0.0182135
Nbv5tr6226309.path1	47.9396	16.7324	1.51883	0.000642134	0.0182651
Nbv5tr6315252.path2	136.783	283.37	-1.05011	0.000648103	0.0183899
novel.3977	31.9154	6.30248	2.34444	0.000655023	0.0185385
Nbv5tr6218503.path1	76.2188	34.3255	1.14904	0.000661486	0.0186126
Nbv5tr6211507.path1	236.924	1671.67	-2.8187	0.000662495	0.0186126
Nbv5tr6245816.path2	28.6899	5.7637	2.33682	0.000662714	0.0186126
Nbv5tr6430123.path1	20.5748	2.80729	2.88075	0.000680184	0.0190132
Nbv5tr6205370.path1	0.613916	14.5324	-4.56444	0.000680429	0.0190132
Nbv5tr6231963.path1	20.406	3.49896	2.5477	0.000685026	0.0191174
Nbv5tr6222005.path1	89.7237	43.3611	1.04777	0.000689658	0.0191979
Nbv5tr6236693.path2	31.0781	5.28217	2.56374	0.000691749	0.0192076
Nbv5tr6208249.path1	18.5289	2.81106	2.72837	0.000694321	0.0192323
novel.899	120.867	58.9015	1.03561	0.000694386	0.0192323
novel.2204	98.0221	37.0529	1.40413	0.000698814	0.0193306
novel.1986	73.4045	148.961	-1.02344	0.000709707	0.0196073
Nbv5tr6217352.path1	30.0332	4.30247	2.82089	0.000738724	0.0202818
Nbv5tr6230681.path2	22.129	1.44658	3.96523	0.000752618	0.0205862
novel.345	134.518	48.9946	1.45695	0.00075547	0.0206233
Nbv5tr6207061.path1	131.035	12.7059	3.36852	0.000760169	0.0206602
novel.4322	14.8642	44.4199	-1.58368	0.000760954	0.0206602
Nbv5tr6248180.path2	70.2564	30.9037	1.18943	0.000770799	0.020876
Nbv5tr6221099.path3	15.1402	43.7249	-1.53353	0.000772698	0.0209018
novel.3228	49.981	17.2587	1.53991	0.000790611	0.0213078
Nbv5tr6312308.path1	39.0259	6.20951	2.6482	0.000806274	0.0216768
novel.3044	120.742	57.9492	1.06228	0.000822848	0.0220417
Nbv5tr6231507.path2	36.43	11.8802	1.61886	0.000835895	0.0223098
Nbv5tr6326540.path1	42.4179	90.7702	-1.09899	0.000857987	0.0228164
Nbv5tr6231556.path1	73.0221	30.0343	1.27776	0.000864011	0.0229489
Nbv5tr6207105.path1	95.7564	43.9241	1.12833	0.000881851	0.0232823
Nbv5tr6220761.path2	17.2412	47.2513	-1.4519	0.000893175	0.0235249
Nbv5tr6242329.path1	14.4909	1.4093	3.37422	0.000920969	0.0241991
Nbv5tr6231333.path1	23.3774	4.14581	2.49076	0.000922225	0.0242032
Nbv5tr6237604.path1	71.8337	33.0427	1.1202	0.000924046	0.0242101
Nbv5tr6216305.path1	66.5677	27.9593	1.2479	0.000925102	0.0242101
Nbv5tr6348846.path2	9.25899	31.1405	-1.75162	0.000925788	0.0242101
Nbv5tr6229756.path1	15.4578	1.73461	3.1522	0.00093457	0.0244108
Nbv5tr6343971.path1	6.16428	26.0907	-2.08411	0.000964714	0.0251088
Nbv5tr6208012.path1	16.4011	2.08966	2.97227	0.000970711	0.025235
Nbv5tr6231698.path1	98.3454	46.1831	1.08977	0.000979833	0.0253823
Nbv5tr6231941.path1	119.583	58.7151	1.02381	0.00100915	0.0259282
Nbv5tr6213833.path1	19.6608	1.98914	3.26785	0.00101201	0.0259715
Nbv5tr6427074.path2	102.437	46.2528	1.14986	0.00101546	0.0260297
Nbv5tr6382074.path1	17.5288	1.73084	3.3361	0.00103175	0.0263857
Nbv5tr6317447.path1	77.1962	35.1572	1.13892	0.00103895	0.0265366
Nbv5tr6219363.path1	64.681	21.0575	1.62225	0.00104677	0.026646
Nbv5tr6229558.path1	17.5747	46.3349	-1.39585	0.00106033	0.0268671
Nbv5tr6289291.path1	15.3576	1.36825	3.47313	0.00108383	0.0273626
Nbv5tr6229563.path1	25.3305	64.2577	-1.34385	0.00108658	0.0273626
novel.635	46.9434	17.0619	1.4602	0.00108824	0.0273626
Nbv5tr6222872.path1	21.3904	60.074	-1.49091	0.00109494	0.0274524
Nbv5tr6231899.path1	2308	361.183	2.67588	0.00110368	0.0275707
Nbv5tr6229763.path1	72.7845	31.354	1.21073	0.00112414	0.0279373
Nbv5tr6237886.path1	20.7021	3.32389	2.60425	0.00113027	0.0280265
Nbv5tr6246655.path1	15.5329	1.36825	3.48764	0.0011461	0.028387
Nbv5tr6220013.path3	58.8174	22.0292	1.41919	0.00115592	0.0285979
novel.2498	28.9162	4.88231	2.56778	0.00115931	0.0286497
Nbv5tr6230638.path1	29.0291	6.83417	2.07532	0.00116858	0.028814
Nbv5tr6233673.path1	32.0238	70.2493	-1.13131	0.00117925	0.0289476
Nbv5tr6241138.path1	2.78208	18.4632	-2.7315	0.00118629	0.0290432
novel.3783	46.5525	15.8498	1.5604	0.0011871	0.0290432
Nbv5tr6389331.path1	23.4739	55.0102	-1.2308	0.00121399	0.0296351
Nbv5tr6237717.path1	37.6401	90.3808	-1.26208	0.0012216	0.0297879
Nbv5tr6409941.path1	1563.67	253.408	2.62553	0.00124264	0.0302005
Nbv5tr6218482.path3	52.8535	19.6326	1.43174	0.00125338	0.0303945
Nbv5tr6335559.path2	36.4227	76.0801	-1.06451	0.00125852	0.0304792
novel.2188	147.303	72.6068	1.0241	0.00126325	0.0305328
Nbv5tr6235546.path1	18.1771	47.0217	-1.37216	0.00126774	0.0306066
Nbv5tr6218481.path1	33.999	10.5828	1.6914	0.00127579	0.0307349
Nbv5tr6380601.path1	52.6149	18.3556	1.51757	0.00127921	0.0307819
Nbv5tr6408437.path1	13.588	0.975931	3.73023	0.00128054	0.0307819
Nbv5tr6349784.path1	18.8298	52.7277	-1.48505	0.00128285	0.0308037
Nbv5tr6202501.path1	3236.19	565.295	2.51727	0.00129338	0.0310229
Nbv5tr6230345.path1	45.6265	98.0109	-1.10303	0.00129994	0.0311156
Nbv5tr6292296.path2	14.4936	1.43904	3.36312	0.00130007	0.0311156
novel.3629	36.0963	74.0148	-1.03634	0.00131166	0.0312569
Nbv5tr6412997.path1	31.6834	5.70423	2.48616	0.00135747	0.0321746
Nbv5tr6423198.path1	33.5354	5.27463	2.67371	0.00138513	0.0326894
Nbv5tr6234985.path1	34.9754	74.9377	-1.10026	0.00142224	0.0332798
Nbv5tr6246567.path1	51.7301	16.1164	1.67573	0.00144404	0.0336805
Nbv5tr6353340.path1	10.4881	36.8614	-1.81518	0.00144548	0.0336805
Nbv5tr6213522.path1	13.208	0.725177	4.23154	0.00144836	0.0337118
Nbv5tr6237935.path1	95.6174	9.00593	3.40752	0.00147326	0.0341735
Nbv5tr6326402.path4	19.0078	2.13071	3.17303	0.00150082	0.0346764
Nbv5tr6237607.path1	378.773	32.7551	3.53161	0.00153172	0.0352792
novel.758	68.8674	31.7301	1.11857	0.00153671	0.0353572
Nbv5tr6224272.path1	32.0974	10.2089	1.65955	0.001581	0.0362249
Nbv5tr6410241.path1	21.5658	4.62401	2.23733	0.00158669	0.0362797
Nbv5tr6344107.path1	14.7688	42.2643	-1.51463	0.00159841	0.0364342
Nbv5tr6204206.path1	32.6533	7.4313	2.14424	0.00160062	0.0364395
Nbv5tr6420441.path1	72.537	31.705	1.1944	0.00160982	0.0365807
Nbv5tr6235178.path3	15.7765	44.9369	-1.51446	0.0016135	0.0366265
Nbv5tr6263445.path1	32.0401	9.24914	1.78352	0.00161535	0.0366306
Nbv5tr6263787.path2	1394.9	484.496	1.52516	0.00161736	0.0366385
Nbv5tr6314310.path2	8.6321	28.7579	-1.73347	0.00162797	0.0368032
Nbv5tr6365267.path1	5.84645	24.649	-2.07143	0.0016333	0.0368479
Nbv5tr6200863.path1	77.9302	31.2825	1.31664	0.00167334	0.0376357
Nbv5tr6321607.path1	16.6618	43.4293	-1.38473	0.00168519	0.0378635
Nbv5tr6281843.path2	26.4104	5.51029	2.25531	0.00169188	0.0379363
Nbv5tr6236043.path1	63.1042	27.7907	1.18279	0.00170156	0.0381146
Nbv5tr6241638.path1	19.1051	46.6315	-1.28666	0.00171451	0.0383655
novel.3822	17.273	44.5641	-1.36706	0.00172514	0.0385642
novel.2932	5.24844	25.5153	-2.27843	0.00173197	0.0386386
Nbv5tr6237281.path1	72.3153	30.1823	1.26423	0.00174569	0.0389052
Nbv5tr6242615.path1	2.47869	15.5851	-2.65705	0.00174892	0.0389378
Nbv5tr6201774.path1	52.8296	0.717633	6.21934	0.00177029	0.0392593
Nbv5tr6228384.path1	24.6834	4.73319	2.36466	0.0017769	0.0393617
Nbv5tr6361434.path2	1.8518	14.1412	-2.92921	0.00181301	0.0399607
Nbv5tr6227176.path1	129.663	57.3257	1.17871	0.0018188	0.0400474
Nbv5tr6218471.path1	13.375	46.397	-1.79499	0.00182309	0.0400625
novel.3305	5.53008	22.9197	-2.04892	0.00182739	0.040117
Nbv5tr6222287.path1	107.699	48.9314	1.13771	0.00189705	0.0414397
Nbv5tr6217778.path1	17.6737	2.31068	2.89341	0.00190071	0.0414784
Nbv5tr6298735.path1	14.4317	1.44281	3.3548	0.00193029	0.0419577
Nbv5tr6236054.path1	61.5326	27.8539	1.1431	0.00195302	0.042368
Nbv5tr6208353.path1	7.71123	26.6796	-1.78807	0.0019679	0.0426069
Nbv5tr6280059.path1	10.1935	31.697	-1.63706	0.00200981	0.0431747
Nbv5tr6217370.path1	25.2936	4.95309	2.36208	0.00202275	0.0434102
Nbv5tr6231517.path1	74.0388	29.5901	1.31922	0.00205178	0.0439903
Nbv5tr6220173.path2	69.9724	0.362589	7.54542	0.00205447	0.0439943
Nbv5tr6388494.path1	30.406	4.11985	2.87747	0.00205723	0.0439943
Nbv5tr6215383.path1	40.6067	13.169	1.63594	0.00207148	0.0442166
Nbv5tr6246546.path1	543.363	73.9968	2.87677	0.00207477	0.0442249
Nbv5tr6213583.path1	50.8116	18.3292	1.46855	0.00207863	0.0442645
Nbv5tr6252770.path2	27.4273	4.93423	2.48006	0.00213525	0.0452513
Nbv5tr6365838.path1	26.4922	7.0838	1.91425	0.00215351	0.045507
Nbv5tr6231306.path1	68.0256	28.9037	1.24029	0.00216671	0.0456081
Nbv5tr6202584.path1	52.3347	17.2327	1.6061	0.00216866	0.0456081
novel.253	69.1652	31.6879	1.13089	0.00218705	0.0459073
Nbv5tr6285097.path1	24.0977	61.4001	-1.35142	0.00223132	0.0467918
Nbv5tr6238099.path1	14.1603	1.36825	3.35633	0.00227041	0.0474542
Nbv5tr6200793.path5	3.09261	16.9673	-2.45364	0.00235563	0.0487946
Nbv5tr6241851.path1	36.5388	11.8057	1.62796	0.00237187	0.0490388
Nbv5tr6240212.path1	7.41012	26.1874	-1.82425	0.00237922	0.0490665
Nbv5tr6343486.path2	13.5183	0.721405	4.2639	0.0023799	0.0490665
Nbv5tr6212519.path1	11.7695	34.2833	-1.54311	0.00239747	0.0493148

## Sheet: Table S3
Table S3 CGMMV_MEL vs CGMMV_CK responsive genes in Tobacco
gene_id	CGMMV_MEL	CGMMV_CK	log2FoldChange	pvalue	padj
Nbv5tr6211260.path2	1442.3	530.449	1.44286	2.3159e-23	4.33142e-19
Nbv5tr6200694.path1	9607.95	3398.41	1.49936	7.9963e-23	7.47774e-19
novel.453	1447.63	588.321	1.29876	7.30325e-16	4.55309e-12
Nbv5tr6212618.path1	89.5639	290.914	-1.70033	1.18759e-14	5.12514e-11
Nbv5tr6200676.path1	2682.15	884.757	1.60014	1.37014e-14	5.12514e-11
Nbv5tr6201421.path1	82.9709	9.4364	3.13253	1.23397e-12	3.84649e-09
novel.1468	193.943	47.669	2.02272	1.34836e-11	3.60264e-08
Nbv5tr6200889.path1	1380.77	3678.31	-1.41384	1.99486e-11	4.4712e-08
Nbv5tr6211457.path1	745.894	1543.01	-1.04822	2.15157e-11	4.4712e-08
Nbv5tr6213172.path1	314.226	118.115	1.41169	7.6403e-11	1.42896e-07
Nbv5tr6215061.path1	81.2001	323.052	-1.99243	1.02268e-10	1.73883e-07
Nbv5tr6257271.path1	184.32	487.775	-1.40495	1.35506e-10	2.11198e-07
Nbv5tr6241925.path1	1034.51	2185.6	-1.07945	2.09637e-10	3.01603e-07
novel.4393	582.977	251.243	1.21414	6.12502e-10	7.81193e-07
Nbv5tr6230744.path1	272.421	589.884	-1.11533	1.04654e-09	1.22334e-06
Nbv5tr6260772.path2	117.453	359.336	-1.61405	1.14621e-09	1.26103e-06
Nbv5tr6205400.path1	73.3219	229.771	-1.65133	1.49605e-09	1.55448e-06
Nbv5tr6233248.path1	126.499	286.557	-1.18094	3.80034e-09	3.55389e-06
novel.890	54.8906	3.63534	3.92569	9.4342e-09	8.02036e-06
Nbv5tr6342370.path1	108.887	270.464	-1.31294	2.26882e-08	1.84495e-05
Nbv5tr6203471.path1	356.835	169.817	1.07205	4.59245e-08	3.57886e-05
Nbv5tr6409495.path1	71.1221	254.749	-1.84371	5.42547e-08	4.0589e-05
Nbv5tr6287499.path1	91.1429	24.2075	1.91189	9.41929e-08	6.38846e-05
Nbv5tr6200879.path1	472.619	983.861	-1.05847	9.56408e-08	6.38846e-05
Nbv5tr6243805.path2	65.2192	241.97	-1.89442	1.0609e-07	6.77655e-05
Nbv5tr6294114.path1	49.1112	212.291	-2.11183	1.08697e-07	6.77655e-05
Nbv5tr6409283.path1	45.1061	2.92269	3.94027	1.74582e-07	0.000102038
Nbv5tr6225065.path1	43.3089	1.29748	5.05043	2.02778e-07	0.000114926
Nbv5tr6199889.path1	189.045	1084.3	-2.52028	2.31891e-07	0.000127561
Nbv5tr6424537.path2	435.465	1083.82	-1.31579	2.67041e-07	0.000142699
novel.3848	74.3631	220.7	-1.57242	3.33122e-07	0.000173066
Nbv5tr6229586.path1	284.008	688.847	-1.27709	3.81592e-07	0.00019289
Nbv5tr6244564.path1	58.2744	10.8184	2.43134	3.98468e-07	0.00019612
Nbv5tr6241936.path1	19.45	102.883	-2.40939	4.32823e-07	0.000207566
Nbv5tr6211157.path1	427.025	937.455	-1.13498	5.11045e-07	0.000228948
novel.3041	121.024	280.153	-1.21241	5.14131e-07	0.000228948
Nbv5tr6241860.path1	483.734	1083.75	-1.16441	5.40015e-07	0.000234881
novel.1911	191.213	87.4256	1.12894	5.7611e-07	0.000239444
Nbv5tr6226847.path1	103.941	36.3632	1.5153	5.97284e-07	0.000242848
Nbv5tr6225034.path2	237.733	622.956	-1.39057	6.58484e-07	0.000262035
novel.3920	130.899	45.966	1.51109	8.97129e-07	0.000346478
Nbv5tr6204091.path1	403.015	162.124	1.31369	9.07738e-07	0.000346478
Nbv5tr6211622.path1	232.923	113.158	1.0418	9.35348e-07	0.00034827
Nbv5tr6270804.path1	556.939	44.0941	3.65862	9.49675e-07	0.00034827
Nbv5tr6224722.path2	81.8036	182.624	-1.15994	1.60326e-06	0.000565769
Nbv5tr6221440.path1	155.018	430.504	-1.47363	1.838e-06	0.00062502
Nbv5tr6267754.path1	54.3341	195.243	-1.84501	2.09953e-06	0.000701206
Nbv5tr6262419.path1	61.4312	199.887	-1.70616	2.20998e-06	0.000725145
Nbv5tr6254553.path1	339.753	157.426	1.10911	2.40455e-06	0.000775384
Nbv5tr6270939.path2	219.304	88.4102	1.31105	2.46408e-06	0.000781112
novel.2121	83.4346	190.513	-1.19215	2.63188e-06	0.000820401
Nbv5tr6350918.path1	37.1195	4.88319	2.92351	2.70248e-06	0.000823669
Nbv5tr6213566.path1	101.499	18.6488	2.44293	2.73044e-06	0.000823669
Nbv5tr6207734.path1	20.4321	83.713	-2.03351	4.18803e-06	0.00120506
Nbv5tr6246541.path2	29.9554	91.5042	-1.61523	5.57141e-06	0.00155526
Nbv5tr6420665.path2	219.548	102.667	1.09712	6.05272e-06	0.00166477
Nbv5tr6380618.path1	24.2784	105.245	-2.11904	6.53247e-06	0.00177068
Nbv5tr6403430.path1	211.394	104.552	1.01609	6.89459e-06	0.0018067
Nbv5tr6337509.path1	154.841	388.611	-1.32806	8.14142e-06	0.00208588
Nbv5tr6337509.path2	50.8242	145.063	-1.51558	9.77513e-06	0.0024706
Nbv5tr6237950.path1	259.505	122.089	1.08745	1.19119e-05	0.00289335
Nbv5tr6391064.path1	17.9039	81.5249	-2.18153	1.38888e-05	0.00328813
Nbv5tr6237768.path1	5.00506	44.9385	-3.17368	1.68254e-05	0.00379139
Nbv5tr6241815.path1	311.869	146.953	1.08549	1.8171e-05	0.00404587
Nbv5tr6218490.path1	101.877	261.234	-1.35999	1.87367e-05	0.00412273
Nbv5tr6257642.path2	590.396	1240.63	-1.07089	1.98583e-05	0.00427111
novel.4145	9.60749	42.5345	-2.14885	2.22419e-05	0.00472716
Nbv5tr6233645.path1	106.78	46.7516	1.19169	2.76876e-05	0.0056287
Nbv5tr6420674.path1	12.4879	47.5496	-1.92565	3.0959e-05	0.00619936
Nbv5tr6225374.path1	507.007	238.994	1.08514	3.11576e-05	0.00619936
novel.3079	198.939	421.589	-1.08441	3.37396e-05	0.00650549
Nbv5tr6241859.path1	53.0673	141.648	-1.41975	3.67073e-05	0.00700548
Nbv5tr6342370.path2	33.6758	108.459	-1.68803	3.77382e-05	0.00712946
Nbv5tr6215353.path1	120.317	270.611	-1.17109	3.89154e-05	0.00727835
Nbv5tr6226653.path1	53.8896	132.131	-1.29243	4.17661e-05	0.007584
Nbv5tr6198604.path1	1.66281	26.3812	-3.99528	4.35546e-05	0.00783271
novel.1049	148.93	319.53	-1.10074	4.39767e-05	0.0078333
Nbv5tr6205955.path2	84.29	236.945	-1.49164	4.71614e-05	0.00832132
Nbv5tr6216316.path1	1.28486	26.3664	-4.33311	5.11732e-05	0.00886197
Nbv5tr6212713.path1	498.251	236.573	1.07453	5.23692e-05	0.00898589
Nbv5tr6216698.path1	189.129	79.8706	1.2438	5.48276e-05	0.0092382
Nbv5tr6225065.path2	143.666	6.8335	4.39263	5.90482e-05	0.0096033
Nbv5tr6224922.path1	30.6439	5.55337	2.46103	6.21929e-05	0.00998871
Nbv5tr6227090.path1	44.9305	7.1647	2.64539	6.2589e-05	0.00998871
Nbv5tr6238620.path1	49.1037	0.323245	7.12544	6.30202e-05	0.00998871
Nbv5tr6245520.path2	54.8135	124.488	-1.18384	6.62645e-05	0.0102696
Nbv5tr6213139.path1	33.298	115.081	-1.79469	6.64394e-05	0.0102696
Nbv5tr6234730.path1	39.7052	92.5898	-1.22275	7.78084e-05	0.0115816
Nbv5tr6400626.path2	2.99807	22.8502	-2.93892	7.80238e-05	0.0115816
Nbv5tr6254773.path1	23.5478	64.0206	-1.44608	8.69278e-05	0.0128017
Nbv5tr6292381.path1	34.0613	5.56317	2.61576	9.02698e-05	0.01319
Nbv5tr6231312.path1	181.724	401.468	-1.14359	0.000101115	0.0145218
Nbv5tr6207773.path1	81.8447	200.031	-1.29124	0.000101714	0.0145218
novel.2356	66.0241	172.072	-1.3824	0.000109117	0.0154607
novel.3228	15.0657	52.9673	-1.82145	0.00011279	0.0158609
Nbv5tr6380601.path2	3.9472	39.1318	-3.30775	0.000121539	0.0168534
Nbv5tr6263409.path1	113.868	46.9813	1.27778	0.000127208	0.0173662
Nbv5tr6199329.path1	59.6757	18.6214	1.67979	0.000128436	0.0174068
Nbv5tr6246556.path1	57.2399	169.392	-1.56841	0.000133958	0.0180245
Nbv5tr6394378.path1	14.6879	49.4635	-1.74525	0.000135253	0.0180638
Nbv5tr6238069.path1	21.5319	1.96725	3.45643	0.000136181	0.0180638
novel.2574	105.553	50.6914	1.05902	0.000173063	0.022019
Nbv5tr6234893.path1	2.30115	27.3644	-3.56937	0.000181233	0.0222186
Nbv5tr6236822.path1	231.653	8.4726	4.77241	0.000190576	0.0223339
Nbv5tr6303034.path1	60.5732	17.9204	1.75483	0.000191062	0.0223339
Nbv5tr6243473.path2	3.67824	37.8151	-3.36949	0.00019356	0.0224503
Nbv5tr6230826.path1	1.63761	23.1326	-3.81443	0.000203123	0.0230243
Nbv5tr6252073.path1	45.5339	13.0793	1.80114	0.000206709	0.0232896
Nbv5tr6412997.path1	4.03944	33.5917	-3.06795	0.000211697	0.0237088
Nbv5tr6259778.path2	19.3826	1.965	3.30065	0.000217884	0.0242565
Nbv5tr6230502.path1	28.3682	70.3378	-1.30977	0.000229919	0.0250779
Nbv5tr6287499.path2	58.4403	17.3119	1.75351	0.000230626	0.0250779
novel.682	81.8368	31.4438	1.37898	0.000245053	0.0264926
novel.3750	49.4887	119.365	-1.27019	0.000247994	0.0265709
Nbv5tr6231509.path1	8.33081	32.7019	-1.97941	0.00027766	0.0290116
Nbv5tr6241794.path1	66.0412	24.8944	1.40695	0.000293124	0.0302889
novel.676	36.2708	87.8883	-1.27676	0.000299207	0.0305796
Nbv5tr6223374.path1	3.02315	24.7149	-3.04512	0.000318095	0.0320604
Nbv5tr6232281.path1	114.155	42.4493	1.42571	0.000318839	0.0320604
novel.2156	74.6651	23.7907	1.64795	0.000332405	0.0327209
novel.120	28.0576	85.5045	-1.60412	0.000335378	0.0328407
Nbv5tr6357077.path1	1.93995	25.7504	-3.71591	0.00034195	0.0333098
Nbv5tr6241301.path1	19.4166	59.7518	-1.62069	0.000350927	0.0340072
Nbv5tr6294027.path2	55.3173	111.362	-1.01069	0.000368422	0.0353364
Nbv5tr6220013.path1	64.9493	139.398	-1.10339	0.000378354	0.0357391
Nbv5tr6410938.path1	113.691	55.8931	1.02376	0.000380337	0.035746
novel.1079	30.7949	6.18966	2.31157	0.000388174	0.0361195
Nbv5tr6266555.path1	124.752	59.0365	1.07842	0.000406923	0.0373073
Nbv5tr6381293.path1	43.3421	95.1535	-1.13246	0.000416274	0.037794
Nbv5tr6413009.path1	54.1494	111.493	-1.04465	0.000434684	0.0389063
Nbv5tr6234380.path1	2.01556	21.7871	-3.4488	0.000451007	0.0401187
Nbv5tr6200886.path1	149.509	322.123	-1.10805	0.000452604	0.0401187
Nbv5tr6221725.path1	50.6809	16.3459	1.6301	0.000478529	0.0420184
Nbv5tr6235922.path2	3.91342	37.4964	-3.25466	0.000505625	0.0439846
Nbv5tr6301476.path1	1955.87	30.2735	6.01347	0.000538767	0.0461874
Nbv5tr6211509.path2	9.2546	34.3559	-1.89318	0.00055431	0.0471239
Nbv5tr6214283.path1	118.31	254.625	-1.10643	0.000588057	0.0488819
novel.2204	33.4903	103.931	-1.63701	0.000594013	0.048942
Nbv5tr6202354.path1	134.005	60.4546	1.14878	0.000597424	0.0489971
Nbv5tr6348146.path2	23.9928	59.1029	-1.29899	0.000601949	0.0489971
Nbv5tr6237455.path1	27.3856	6.25622	2.13456	0.000602541	0.0489971
Nbv5tr6413004.path1	1062.44	2692.27	-1.34158	0.000615632	0.0496301
